# Supplementary material for: Preparation of self-healing polyurethane/functionalized graphene nanocomposites as electro-conductive one part adhesives
Source: Royal Society of Chemistry journal article supplement (doi:10.1039/c8ra03685c), 2018-01-01
Supplement: c8ra03685c1.pdf [file c8ra03685c1.pdf]

## Supporting Information

### **Preparation of Self-healing Polyurethane/Functionalized Graphene Nanocomposite as an Electro-Conductive One Part Adhesive**

**Farzaneh Hashemi Nasr<sup>a</sup>, Mehdi Barikani<sup>\*,b</sup> Mehdi Salehirad<sup>a</sup>**

<sup>a</sup> *Chemistry and Process Department, Niroo Research Institute, P.O. Box 1468613113, Tehran, Iran.*

<sup>b</sup> *Department of Polyurethane and Nanopolymers, Iran Polymer and Petrochemical Institute, P.O. Box  
14965/115, Tehran, Iran.*

[M.Barikani@ippi.ac.ir](mailto:M.Barikani@ippi.ac.ir)

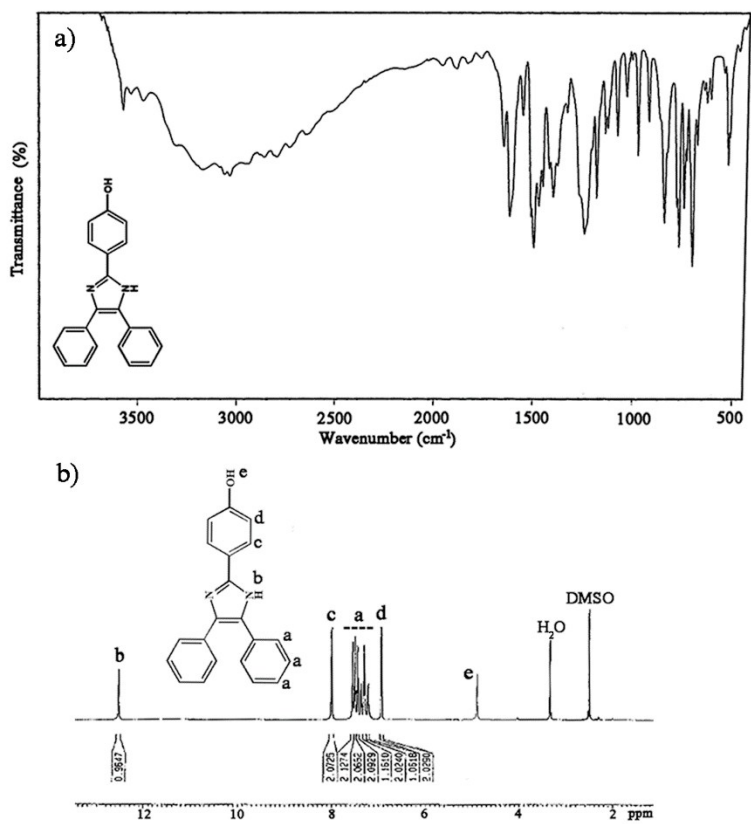

**Fig. S1.** (a) FT-IR and (b) <sup>1</sup>H NMR spectra of DIP.

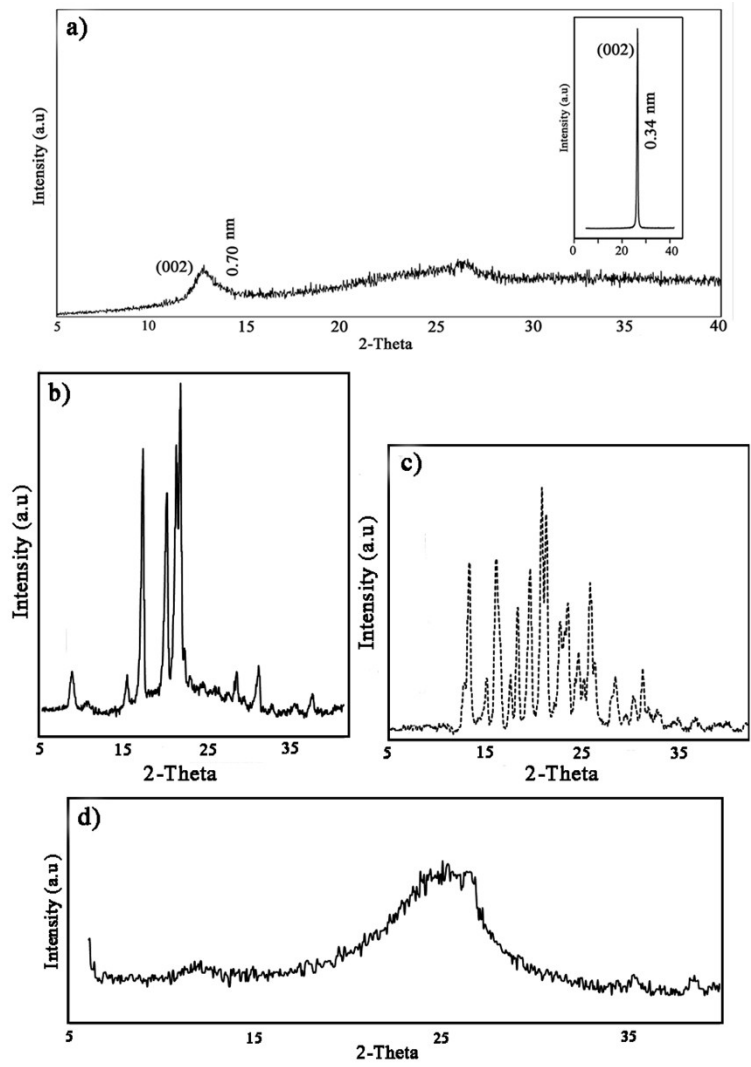

**Fig. S2.** XRD patterns of (a) GO, (b) DIP-g-GO, (c) DIP and (d) DIP-g-rGO.

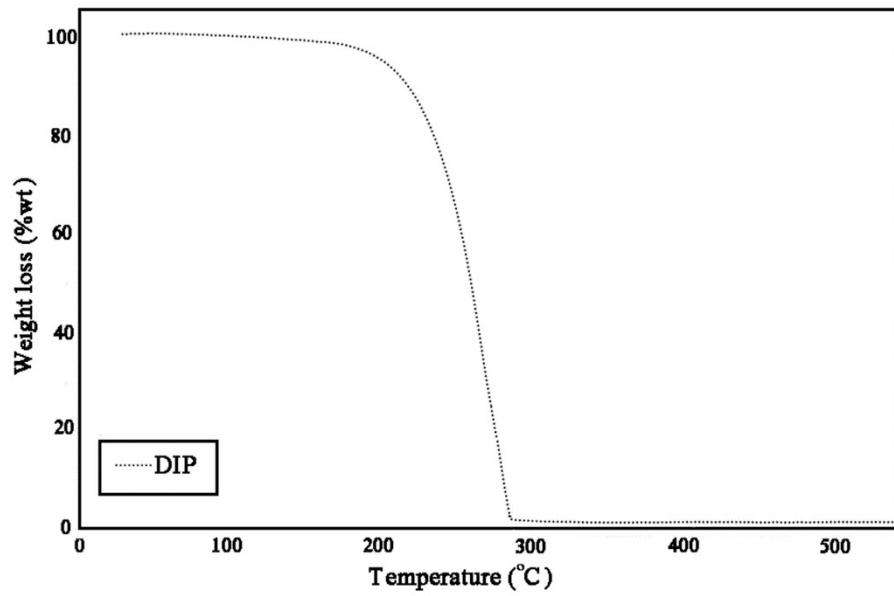

**Fig S3.** TGA thermogram of DIP.

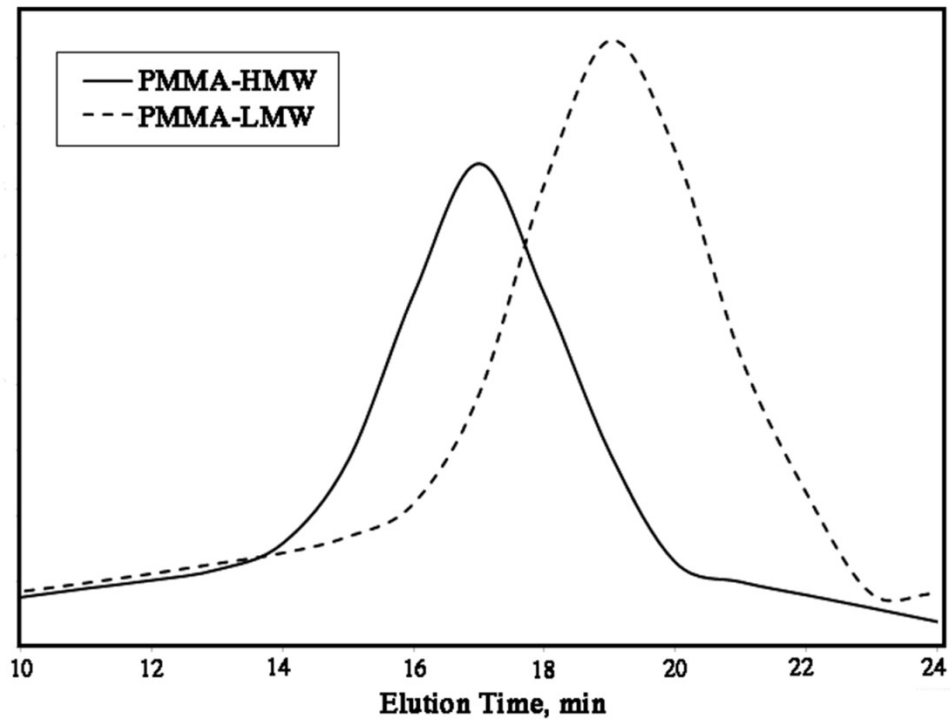

**Fig. S4.** GPC curves of PMMA (HMW and LMW).

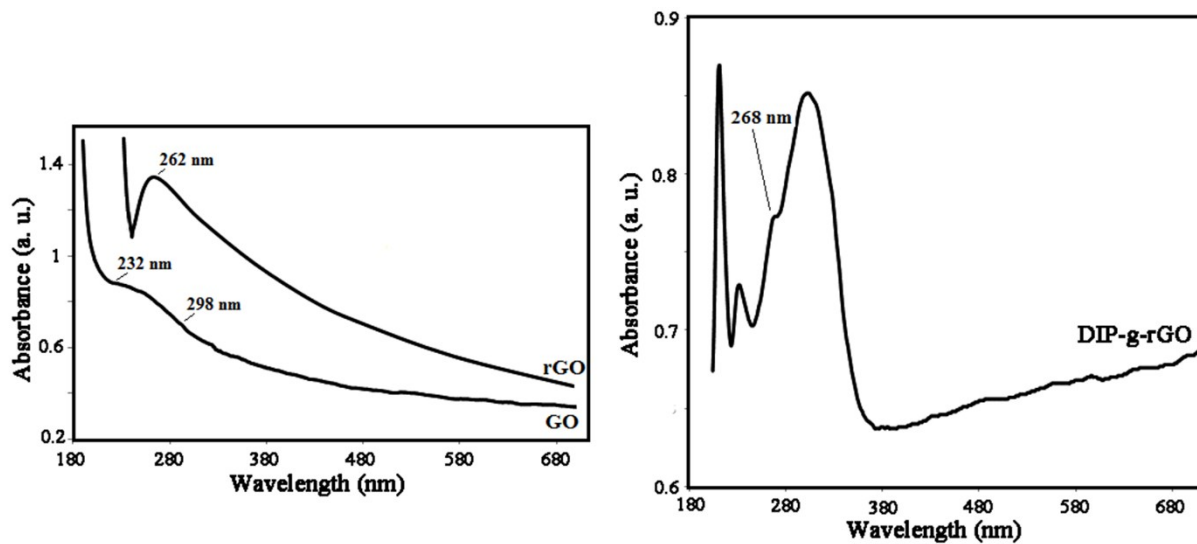

**Fig. S5.** UV-Vis spectra of GO, rGO and DIP-g-rGO.
